# Supplementary material
Source: PubMed Central journal article supplement (PMC1253577)
Supplement: pnas_0506581102_1.pdf [file pnas_0506581102_1.pdf]

## Supplemental Figures

CYP82E2 ATGGTTTTCCCATAGAAGCCTTTGTAGGACTAGTAACCTT--CACATTTCTCTTATAC 57  
131A\_A02 ATGGTTTTTCCCATAGAAGCCATTGTAGGAGCAGTAACCCTAATTAACATTTCTCTTATAC 60  
3D\_C12-15 ATGGTTTTTCCCATAGAAGCCTTTGTAGGACTAGTAACCTT--CACATTTCTCTTATAC 57  
CYP82E4v2 ATGCTTTCTCCCATAGAAGCCATTGTAGGACTAGTAACCTT--CACATTTCTCTTCTTC 57  
CYP82E4v1 ATGGTTTTTCCCATAGAAGCCATTGTAGGACTAGTAACCTT--CACATTTCTCTTCTTC 57  
CYP82E3 ATGGTTTTTCCGGTAGAAGCCATTGTAGGGCTAGTGACCTT--CACATTTCTCTTCTAC 57  
\*\*\*\*\*--\*\*\*\*\*--\*\*\*\*\*--\*\*\*\*\*--\*\*\*\*\*--\*\*\*\*\*--\*\*  
CYP82E2 TTCCCTATGGACAAAAAATCTCAAAAACCTTCAAAAACCTTTACCAACCGAAAAATCCCCGGA 117  
131A\_A02 TTCCCTATGTACAAAAAATCTCAAAAACATTTCAAAGCCCTTACCACCGAAAAATCCCCGGA 120  
3D\_C12-15 TTCCCTATGGACAAAAAATCTCAAAAACCTTCAAAAACCTTTACCAACCGAAAAATCCCCGGA 117  
CYP82E4v2 TTCCCTATGGACAAAAAATCTCAAAAACCTTCAAAAACCTTTACCAACCGAAAAATCCCCGGA 117  
CYP82E4v1 TTCCCTATGGACAAAAAATCTCAAAAACCTTCAAAAACCTTTACCAACCGAAAAATCCCCGGA 117  
CYP82E3 TTCCCTATGGACAAAAAATCTCAAAAACCTTCAAAAACCTTTACCAACCGAAAAATCCCCGGA 117  
\*\*\*\*\*\_\*\*\*\*\*--\*\*\*\*\*--\*\*\*\*\*--\*\*\*\*\*--\*\*\*\*\*--\*\*\*\*\*--\*\*\*  
CYP82E2 GGATGGCCGGTAATCGGCCATCTTTTCACTTCAATAAAGACGGCGACCGTCCATTAA 177  
131A\_A02 GGATGGCCGGTAATCGGCCATCTTTTCCACTTCAATAAAGACGGCGACCGTCCATT 180  
3D\_C12-15 GGATGGCCGGTAATCGGCCATCTTTTCACTTCAATAAAGACGGCGACCGTCCATTAA 177  
CYP82E4v2 GGATGGCCGGTAATCGGCCATCTTTTCCACTTCAATAAAGACGGCGACCGTCCATTAA 177  
CYP82E4v1 GGATGGCCGGTAATCGGCCATCTTTTCCACTTCAATAAAGACGGCGACCGTCCATTAA 177  
CYP82E3 GGATGGCCGGTAATCGGCCATCTTTTCTACTTCTGATGACGACGGCGACCGTCCATTAA 177  
\*\*\*\*\*--\*\*\*\*\*--\*\*\*\*\*--\*\*\*\*\*--\*\*\*\*\*--\*\*\*\*\*--\*\*\*\*\*--







CYP82E2 1014 GCAGCAGACACAGTTGCTCTTCCACATAAAATTGGGGAATGACATTAATTGATAAAACAATCAA  
 CYP82E4v2 1014 GCAGCAGACACAGTTGCTCTTCCACATAAAATTGGGGAATGGCATTAATTGATAAAACAATCAA  
 CYP82E4v1 1014 GCAGCAGACACAGTTGCTCTTCCACATAAAATTGGGGAATGGCATTAATTGATAAAACAATCAA  
 CYP82E3 1017 GCAGCAGACACAGTTGCTCTTCCACATAAAATTGGGGAATGGCATTAATTGATAAAACAATCAA  
 \*\*\*\*\*-\*\*\*\*\*-\*\*\*\*\*-\*\*\*\*\*-\*\*\*\*\*-\*\*\*\*\*-\*\*\*\*\*-\*\*\*\*\*  
 CYP82E2 1074 AATGCCCTTGAATGAAAGCACAAAGAGATAGACACAAAAAGTTGGTAAGGATAGATGGGTA  
 CYP82E4v2 1074 AAGGCCCTTGACGAAAAGCACAAAGAGATAGACACAAAAAGTTGGTAAGGACAGATGGGTA  
 CYP82E4v1 1074 AAGGCCCTTGACGAAAAGCACAAAGAGATAGACACAAAAAGTTGGTAAGGACAGATGGGTA  
 CYP82E3 1077 AATGCCCTTGAAGAAAAGCACAAAGAGATAGACACAAAAAGTTGGTAAGGATAGATGGGTA  
 \*\*\*\*\*-\*\*\*\*\*-\*\*\*\*\*-\*\*\*\*\*-\*\*\*\*\*-\*\*\*\*\*-\*\*\*\*\*-\*\*\*\*\*  
 CYP82E2 1134 GAAGAGAGTGATATTAAAGGATTTAGTATACCTCCAAGCTATTGTTAAAAAGGTGTTACGA  
 CYP82E4v2 1134 GAAGAGAGTGATATTAAAGGATTTGGTATACCTCCAAGCTATTGTTAAAAAGGTGTTACGA  
 CYP82E4v1 1134 GAAGAGAGTGATATTAAAGGATTTGGTATACCTCCAAGCTATTGTTAAAAAGGTGTTACGA  
 CYP82E3 1137 GAAGAGAGTGATATTAAAGGATTTGGTATACCTCCAAGCTATTGTTAAAAAGGTGTTACGA  
 \*\*\*\*\*-\*\*\*\*\*-\*\*\*\*\*-\*\*\*\*\*-\*\*\*\*\*-\*\*\*\*\*-\*\*\*\*\*-\*\*\*\*\*  
 CYP82E2 1194 TTATATCCACCAGGACCTTTGTTAGTACCACATGAAAAATGTAAGGATTTGTGTTGTTAGT  
 CYP82E4v2 1194 TTATATCCACCAGGACCTTTGTTAGTACCACACGAAAAATGTAGAAAGATTTGTGTTGTTAGT  
 CYP82E4v1 1194 TTATATCCACCAGGACCTTTGTTAGTACCACACGAAAAATGTAGAAAGATTTGTGTTGTTAGT  
 CYP82E3 1197 TTATATCCACCAGGACCTTTGTTAGTACCACACGAAAAATGTAGAAAGATTTGTGTTGTTAGT  
 \*\*\*\*\*-\*\*\*\*\*-\*\*\*\*\*-\*\*\*\*\*-\*\*\*\*\*-\*\*\*\*\*-\*\*\*\*\*-\*\*\*\*\*  
 CYP82E2 1254 GGATATCACATTCCCTAAAGA GACTAGATTATTCCGCAAAACGTCA TGA AACTGCA GCGCGAT  
 CYP82E4v2 1254 GGATATCACATTCCCTAAAGGACAAGATTATTCCGCAAAACGTCA TGA AACTGCA ACGTGAT  
 CYP82E4v1 1254 GGATATCACATTCCCTAAAGGACAAGATTATTCCGCAAAACGTCA TGA AACTGCA ACGTGAT  
 CYP82E3 1257 GGATATCACATTCCCTAAAGGAACTAGACTATTCCGCAAAATGTAATGAAACTA CA AACTGAT  
 \*\*\*\*\*-\*\*\*\*\*-\*\*\*\*\*-\*\*\*\*\*-\*\*\*\*\*-\*\*\*\*\*-\*\*\*\*\*-\*\*\*\*\*
