# Supplementary material
Source: PubMed Central journal article supplement (PMC1253577)
Supplement: pnas_0506581102_2.pdf [file pnas_0506581102_2.pdf]

```

CYP82E2      EGYSRDVTVIKATVFSVLVDAADTVALHINWGMTLLINNQNALMKAQEEIDTKVGKDRWVE 359
CYP82E4v1    EGYSRDVTVIKATVFSVLVDAADTVALHINWGMALLINNQKALTKAQEEIDTKVGKDRWVE 359
CYP82E4v2    EGYSRDVTVIKATVFSVLVDAADTVALHINWGMALLINNQKALTKAQEEIDTKVGKDRWVE 359
CYP82E3      EGYSRDVTVIKATVFSVLVDAADTVALHINCGMALLINNQNALMKAQEEIDTKVGKDRWVE 360
*****
CYP82E2      ESDIKDLVYLQAIVKKVLRLYPPGPLLVPHENVKDCVVSGYHIPKETRLFANVMKLRDP 419
CYP82E4v1    ESDIKDLVYLQAIVKEVLRRLYPPGPLLVPHENVEDCVVSGYHIPKETRLFANVMKLRDP 419
CYP82E4v2    ESDIKDLVYLQAIVKEVLRRLYPPGPLLVPHENVEDCVVSGYHIPKETRLFANVMKLRDP 419
CYP82E3      ESDIKDLVYLQAIVKEVLRRLYPPGPLLVPHENVEDCVVSGYHIPKETRLFANVMKLRDP 420
*****
CYP82E2      KLLSNPDKFDPERFIAGDIDFRGHHYEFIPFGSRRRSCPGMTYALQVEHLLTMAHLIQGFN 479
CYP82E4v1    KLWSDPDTFDPERFIATDIDFRGQYKYIIPFGSRRRSCPGMTYALQVEHLLTMAHLIQGFN 479
CYP82E4v2    KLWSDPDTFDPERFIATDIDFRGQYKYIIPFGSRRRSCPGMTYALQVEHLLTMAHLIQGFN 479
CYP82E3      KLWSNPDKFNPERFIARDIDFHGQHEYIIPFGSRRRSCPGMTYALQVEHLLTMAHLIQGFN 480
** *:.:*****
CYP82E2      YKTPNDEALDMKEGAGITIRKVNPVELIITPRLAPELY 517
CYP82E4v1    YRTPNDEPLDMKEGAGITIRKVNPVELIIAPRLAPELY 517
CYP82E4v2    YRTPNDEPLDMKEGAGITIRKVNPVELIIAPRLAPELY 517
CYP82E3      YRTPTDEPLDMKEGAGITIRKVNPVKVIITPRLAPELY 518
**:.:*****

```

Figure 6. Alignment of predicted protein sequences of full length members of the CYP82E2 family of P450 genes. Asterisks denote positions conserved among all four sequences. Residues that differ among the members are shaded in gray.
